# Supplementary material
Source: publisher figshare collection journal article supplement (https://diabetesjournals.figshare.com/articles/dataset/_/26524384)
Supplement: Supplementary file 1 [file 1]

Diabetes Overtreatment and Hypoglycemia in Older Patients with type 2 Diabetes on Insulin Therapy:  
Insights from the HYPOAGE Cohort study

Antoine Christiaens PhD, Anne-Sophie Boureau MD, Béatrice Guyomarch MSc,  
Laure de Decker MD, Benoit Boland PhD, Samy Hadjadj MD, Bertrand Cariou MD, for the HYPOAGE  
Study group.

**ONLINE-ONLY SUPPLEMENTAL MATERIAL**

- **Page 2: Supplemental Table S.1.** Complementary methods information of HYPOAGE cohort and covariate
- **Page 3: Supplemental Figure S.1.** Definitions of diabetes overtreatment
- **Page 4: Supplemental Figure S.2.** Study flowchart.
- **Page 5 Supplemental Table S.2.** Complementary baseline patient's characteristics
- **Page 6: Supplemental Table S.3** Comparison of CGM metrics according to overtreatment proxy-definitions (fixed and individualized)

**Supplemental Table S.1.** Complementary methods information of HYPOAGE cohort and covariate definitions

|                               |                                                                                                                                                                                                                                                                                                                                                                                                                                                                                                                                                                                                                                                                                                                                                                                                                                                                                                                                                                                                                                                                                                                                                                                                                                                                                                                                                                                                                                         |
|-------------------------------|-----------------------------------------------------------------------------------------------------------------------------------------------------------------------------------------------------------------------------------------------------------------------------------------------------------------------------------------------------------------------------------------------------------------------------------------------------------------------------------------------------------------------------------------------------------------------------------------------------------------------------------------------------------------------------------------------------------------------------------------------------------------------------------------------------------------------------------------------------------------------------------------------------------------------------------------------------------------------------------------------------------------------------------------------------------------------------------------------------------------------------------------------------------------------------------------------------------------------------------------------------------------------------------------------------------------------------------------------------------------------------------------------------------------------------------------|
| Inclusion criteria            | Patients from HYPOAGE cohort meeting the following criteria: outpatients aged 75 years or older, with T2D (duration of $\geq 1$ year), treated by a glucose-lowering treatment including insulin for at least 6 consecutive months, with a HbA1c measure at baseline and who measured blood glucose using $\geq 2$ self-monitoring blood glucose (SMBG) per day.                                                                                                                                                                                                                                                                                                                                                                                                                                                                                                                                                                                                                                                                                                                                                                                                                                                                                                                                                                                                                                                                        |
| Exclusion criteria            | Patients with type 1 diabetes, with corticosteroid-induced diabetes, with an estimated life expectancy lower than 6 months, or unable to follow the study procedures.                                                                                                                                                                                                                                                                                                                                                                                                                                                                                                                                                                                                                                                                                                                                                                                                                                                                                                                                                                                                                                                                                                                                                                                                                                                                   |
| Ethics                        | The original study fulfilled all ethical requirements (approved by the independent ethical committee CPP Ouest IV, ref 47/16) and patients were enrolled after signing an informed written consent.                                                                                                                                                                                                                                                                                                                                                                                                                                                                                                                                                                                                                                                                                                                                                                                                                                                                                                                                                                                                                                                                                                                                                                                                                                     |
| Covariates definitions        | <p>Sociodemographic (age, sex), clinical (health status, comorbidities, diabetes duration, BMI, current medications including glucose-lowering treatment), biological (HbA1c and estimated glomerular filtration rate (eGFR) using the CKD-EPI formula) and geriatric data (comprehensive geriatric assessment) were collected at baseline. HbA1c was expressed as % (using the standards of the National Glycohemoglobin Standardization Program) and mmol/mol (using the standards of the International Federation of Clinical Chemistry).</p> <p>The comprehensive geriatric assessment was performed by a trained geriatrician and included physical performances (Timed Up and Go test, gait speed, and 5 times sit to stand test), functional status (Katz score (range: 0-6) for dependence in activities of daily living), cognition (Mini-Mental State Examination (MMSE) and Frontal Assessment Battery (BREF score); cognitive impairment: MMSE &lt; 24/30 and/or BREF score &lt; 16/18), major depressive disorder (Mini-Geriatric Depression Scale), and nutritional status (based on Body Mass Index and Mini-Nutritional Assessment). Frailty was defined according to the Fried definition. Health status was defined according to the three-tiered Blaum's classification (good, intermediate and poor health status), based on comorbidities, functional status, and cognitive status [Supplemental Figure S.1.].</p> |
| Predictive values calculation | <p>Sensitivity <math>\left[ \frac{TP}{TP+FN} \right]</math>, specificity <math>\left[ \frac{TN}{TN+FP} \right]</math>, and accuracy <math>\left[ \frac{TP+TN}{TP+TN+FP+FN} \right]</math>, considering true positive (TP) as the proportion of hypoglycemic patients with overtreatment, true negative (TN) as the proportion of non-hypoglycemic patients without overtreatment, false negative (FN) as the proportion of hypoglycemic patients without overtreatment, and false positive (FP) as the proportion of non-hypoglycemic patients with overtreatment. All measures of diagnostic performances were presented with their 95% confidence interval.</p> <p>Mc Nemars's tests compared diagnostic performances between the two different proxy-definitions of overtreatment.</p>                                                                                                                                                                                                                                                                                                                                                                                                                                                                                                                                                                                                                                               |

## Supplemental Figure S.1. Proxy-Definitions of diabetes overtreatment (patients on insulin).

Abbreviations: ADL, activities of daily living; IADL, instrumental activities of daily living.

### FIXED PROXY-DEFINITION OF DIABETES OVERTREATMENT

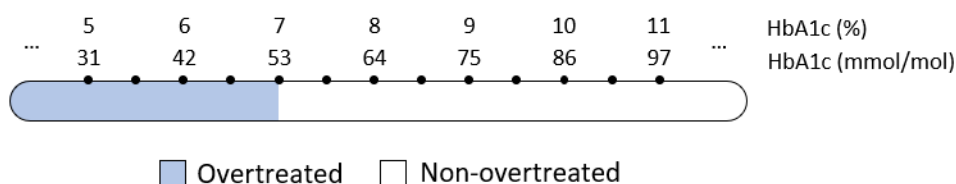

### INDIVIDUALIZED PROXY-DEFINITION OF DIABETES OVERTREATMENT

A. PATIENTS IN GOOD HEALTH STATUS *[absence of diabetic comorbidities,  $\leq 2$  non-diabetes chronic illnesses, no basic ADL impairments and  $\leq 1$  instrumental ADL impairment]*

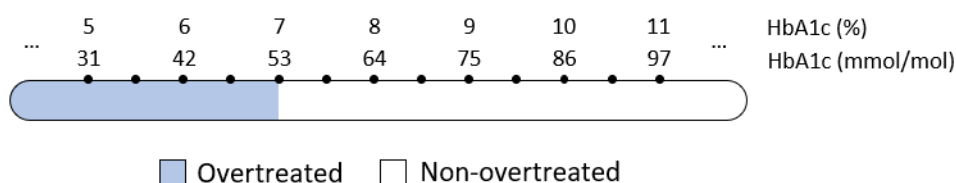

B. PATIENTS IN INTERMEDIATE HEALTH STATUS *[ $\geq 3$  non-diabetes chronic illnesses, mild cognitive impairment/early dementia or  $\geq 2$  IADL impairments]*

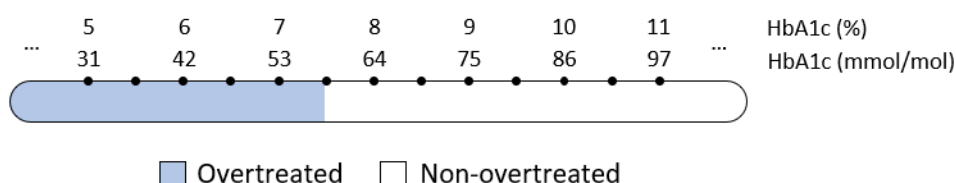

C. PATIENTS IN POOR HEALTH STATUS *[end-stage medical condition, moderate/severe dementia,  $\geq 2/5$  ADL impairments or residence in a long-term nursing facility]*

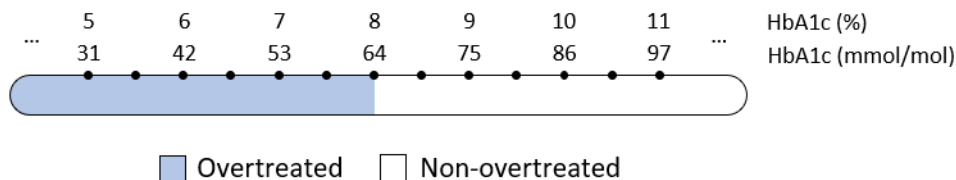

**Supplemental Figure S.2.** Study flowchart.

Abbreviations: FSLP, FreeStyle Libre Pro® Sensor.

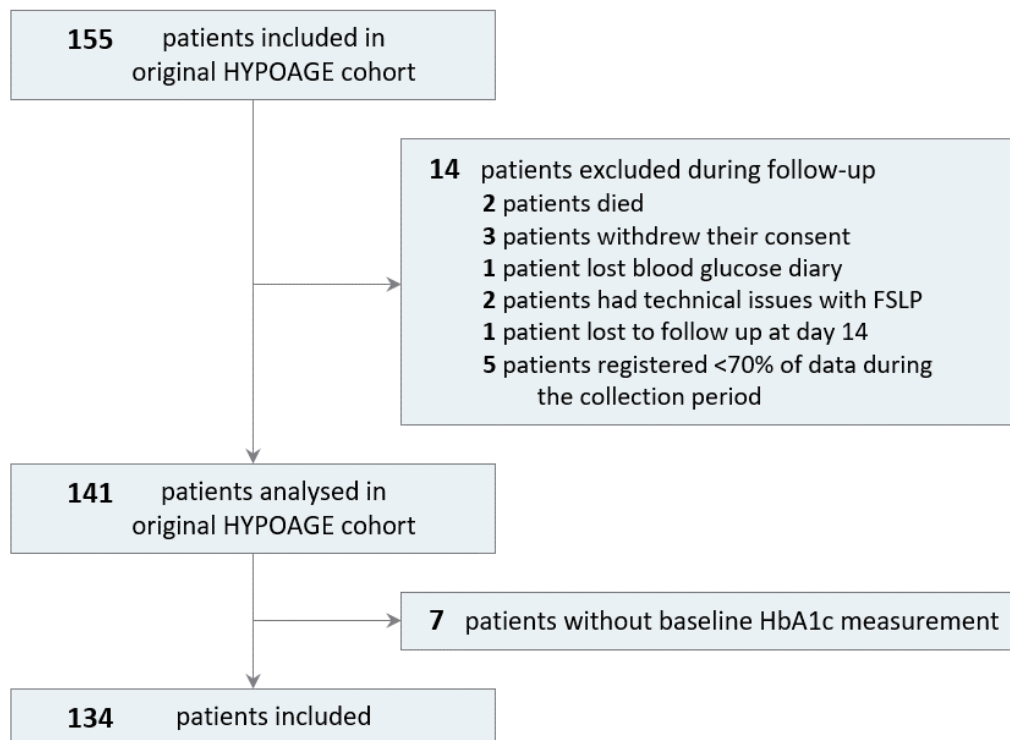

**Supplemental Table S.2.** Complementary baseline patient's characteristics according to the fixed and the individualized proxy-definitions of diabetes overtreatment, including data on diabetes treatment and diabetes co-morbidities

|                                   | Diabetes overtreatment<br>fixed proxy-definition<br>Mean $\pm$ SD <i>or</i> n (%) |                     |         | Diabetes overtreatment<br>individualized proxy-definition<br>Mean $\pm$ SD <i>or</i> n (%) |                     |         |
|-----------------------------------|-----------------------------------------------------------------------------------|---------------------|---------|--------------------------------------------------------------------------------------------|---------------------|---------|
|                                   | No<br>n=109 (81.3%)                                                               | Yes<br>n=25 (18.7%) | p-value | No<br>n=81 (60.4%)                                                                         | Yes<br>n=53 (39.6%) | p-value |
| Age $\geq$ 85 years               | 35 (32.1%)                                                                        | 7 (28.0%)           | 0.690   | 25 (30.9%)                                                                                 | 17 (32.1%)          | 0.883   |
| Diabetes duration $\geq$ 20 years | 61 (65.6%)                                                                        | 14 (60.9%)          | 0.672   | 47 (67.1%)                                                                                 | 28 (60.9%)          | 0.489   |
| Insulin regimen                   |                                                                                   |                     |         |                                                                                            |                     |         |
| Basal insulin                     | 52 (47.7%)                                                                        | 11 (44.0%)          | 0.690   | 38 (46.9%)                                                                                 | 25 (47.2%)          | 0.962   |
| 2 or 3 injections/day             | 22 (20.2%)                                                                        | 7 (28.0%)           |         | 17 (21.0%)                                                                                 | 12 (22.6%)          |         |
| Basal-bolus or CSII               | 35 (32.1%)                                                                        | 7 (28.0%)           |         | 26 (32.1%)                                                                                 | 16 (30.2%)          |         |
| GLD regimen <sup>1</sup>          |                                                                                   |                     |         |                                                                                            |                     |         |
| Monotherapy (insulin)             | 42 (38.5%)                                                                        | 14 (56.0%)          | 0.177   | 28 (34.6%)                                                                                 | 28 (52.8%)          | 0.104   |
| Bitherapy                         | 31 (28.4%)                                                                        | 7 (28.0%)           |         | 25 (30.9%)                                                                                 | 13 (24.5%)          |         |
| Tritherapy or more                | 36 (33.0%)                                                                        | 4 (16.0%)           |         | 28 (34.6%)                                                                                 | 12 (22.6%)          |         |

<sup>1</sup> Number of different GLD classes/day

Abbreviations: SD, Standard deviation; GLD, Glucose-lowering drug

**Supplemental Table S.3.** Comparison of CGM metrics according to overtreatment proxy-definitions  
(fixed and individualized)

|                                               | Diabetes overtreatment,<br>fixed proxy-definition<br>Median [interquartile range] |                        |              | Diabetes overtreatment,<br>individualized proxy-definition<br>Median [interquartile range] |                        |              |
|-----------------------------------------------|-----------------------------------------------------------------------------------|------------------------|--------------|--------------------------------------------------------------------------------------------|------------------------|--------------|
|                                               | No<br>n=109<br>(81.3%)                                                            | Yes<br>n=25 (18.7%)    | p-value      | No<br>n=81 (60.4%)                                                                         | Yes<br>n=53 (39.6%)    | p-value      |
| Time of worn CGM, <i>days</i>                 | 28.0<br>[22.0;29.0]                                                               | 29.0<br>[27.0;29.0]    | 0.005        | 28.0<br>[24.0;29.0]                                                                        | 29.0<br>[27.0;29.0]    | 0.077        |
| Time of active CGM, %                         | 99.8<br>[99.6;100.0]                                                              | 99.7<br>[99.7;100.0]   | 0.755        | 99.8<br>[99.6;100.0]                                                                       | 99.8<br>[99.6;100.0]   | 0.718        |
| Mean glucose, <i>mg/dL</i>                    | 154.2<br>[134.0;180.0]                                                            | 123.3<br>[112.2;140.0] | < .001       | 157.1<br>[134.6;189.7]                                                                     | 137.2<br>[118.2;152.6] | < .001       |
| Glucose management<br>indicator (GMI), %      | 7.0<br>[6.5;7.6]                                                                  | 6.3<br>[6.0;6.7]       | < .001       | 7.1<br>[6.5;7.8]                                                                           | 6.6<br>[6.1;7.0]       | < .001       |
| Glycemic variability (%<br>CV), %             | 34.9<br>[29.8;40.2]                                                               | 31.7<br>[29.0;35.7]    | 0.058        | 34.7<br>[30.0;40.2]                                                                        | 32.6<br>[29.2;37.7]    | 0.333        |
| <b>TAR</b> , %<br>(glycemia >180 mg/dL)       | 28.0<br>[15.4;44.7]                                                               | 5.9<br>[2.7;16.6]      | < .001       | 29.9<br>[18.3;51.2]                                                                        | 15.4<br>[4.0;26.7]     | < .001       |
| Level 2 TAR, %<br>(glycemia >250 mg/dL)       | 5.2<br>[1.1;15.7]                                                                 | 0.0<br>[0.0;1.4]       | < .001       | 5.8<br>[1.5;17.6]                                                                          | 0.6<br>[0.0;5.1]       | < .001       |
| Level 1 TAR, %<br>(glycemia 181-250<br>mg/dL) | 22.7<br>[12.9;28.1]                                                               | 5.9<br>[2.7;16.2]      | < .001       | 23.8<br>[15.7;30.4]                                                                        | 13.2<br>[3.8;20.7]     | < .001       |
| <b>TIR</b> , %<br>(glycemia 70-180 mg/dL)     | 65.7<br>[50.0;78.3]                                                               | 82.4<br>[73.1;90.0]    | < .001       | 62.6<br>[46.7;75.6]                                                                        | 79.6<br>[64.2;86.1]    | < .001       |
| TIR (70-180 mg/dL),<br><i>hours/day</i>       | 15:45<br>[12:00;18:47]                                                            | 19:46<br>[17:32;21:36] | < .001       | 14:43<br>[11:00;18:05]                                                                     | 19:09<br>[15:29;20:42] | < .001       |
| <b>TBR</b> , %<br>(glycemia <70 mg/dL)        | 2.6<br>[0.9;6.4]                                                                  | 6.3<br>[1.1;12.1]      | 0.059        | 2.6<br>[0.9;5.1]                                                                           | 4.1<br>[1.1;12.1]      | 0.077        |
| Level 1 TBR, %<br>(glycemia 54-69 mg/dL)      | 2.0<br>[0.6;4.1]                                                                  | 4.3<br>[1.1;6.1]       | <b>0.034</b> | 2.0<br>[0.6;3.6]                                                                           | 3.6<br>[0.9;6.1]       | <b>0.038</b> |
| Level 2 TBR, %<br>(glycemia <54 mg/dL)        | 0.7<br>[0.0;2.7]                                                                  | 0.9<br>[0.2;4.7]       | 0.140        | 0.7<br>[0.0;2.0]                                                                           | 0.7<br>[0.2;4.2]       | 0.239        |

Abbreviations: CGM, Continuous glucose monitoring; CV, coefficient of variation; TAR, Time above range; TBR, Time below range; TIR, Time in range.
