# Supplementary material
Source: publisher figshare collection journal article supplement (https://diabetesjournals.figshare.com/articles/dataset/_/26524384)
Supplement: Supplementary file 2 [file 1]

## **HYPOAGE study group**

**Bertrand Cariou**, Department of Endocrinology, CHU Nantes, Nantes, France (PI)

**Samy Hadjadj**, Department of Endocrinology, CHU Nantes, Nantes, France

**Pierre Morcel**, CIC Endocrinology, CHU Nantes, Nantes, France

**Matthieu Wargny**, CIC Endocrinology, CHU Nantes, Nantes, France

**Béatrice Guyomarch**, l'institut du thorax, CHU Nantes

**Anne-Sophie Boureau**, Department of Gerontology, CHU Nantes, Nantes, France

**Guillaume Chapelet**, Department of Gerontology, CHU Nantes, Nantes, France

**Laure de Decker**, Department of Gerontology, CHU Nantes, Nantes, France

**Cédric Anweiller**, Department of Gerontology, CHU Angers, Angers, France

**Ingrid Allix**, Department of Endocrinology, CHU Angers, Angers, France

**Claire Briet**, Department of Endocrinology, CHU Angers, Angers, France

**Pierre Gourdy**, Department of Diabetology, CHU Toulouse, Toulouse, France

**Sophie Guyonnet**, Gerontopole of Toulouse, Institute of Ageing, CHU Toulouse, Toulouse, France

**Marc Paccalin**, Department of Gerontology, CHU Poitiers, Poitiers, France

**Pierre-Jean Saulnier**, CIC, CHU Poitiers, Poitiers, France

**Isabelle Delabrière**, Department of Gerontology, CHRU Lille, Lille, France

**Rachel Litke**, Department of Gerontology, CHRU Lille, Lille, France

**Nathalie Cervantes**, Centre Hospitalier Sud Francilien, Corbeil-Essonnes, France

**Alfred Penfornis**, Centre Hospitalier Sud Francilien, Corbeil-Essonnes, France
